# Supplementary material for: Meeting a threat of the Anthropocene: Taste avoidance of metal ions by Drosophila
Source: PubMed Central journal article supplement — Proc Natl Acad Sci U S A. 2022 Jun 14;119(25):e2204238119. doi: 10.1073/pnas.2204238119 (PMC9231609; doi:10.1073/pnas.2204238119), 2022-06-14
Supplement: pnas.2204238119.sapp.pdf [file pnas.2204238119.sapp.pdf]

# PNAS

www.pnas.org

1  
2  
3  
4  
5  
6  
7  
8  
9  
10  
11  
12  
13  
14  
15  
16  
17  
18  
19  
20  
21  
22  
23

**Supplementary Information for**

Meeting a threat of the Anthropocene: taste avoidance of metal ions by  
*Drosophila melanogaster*

Shuke Xiao, Lisa S. Baik, Xueying Shang, John R. Carlson\*

Department of Molecular, Cellular and Developmental Biology, Yale University, New Haven, CT 06511

\*John R. Carlson

**Email:** [john.carlson@yale.edu](mailto:john.carlson@yale.edu)

**This PDF file includes:**

Figures S1 to S5  
Tables S1  
SI References

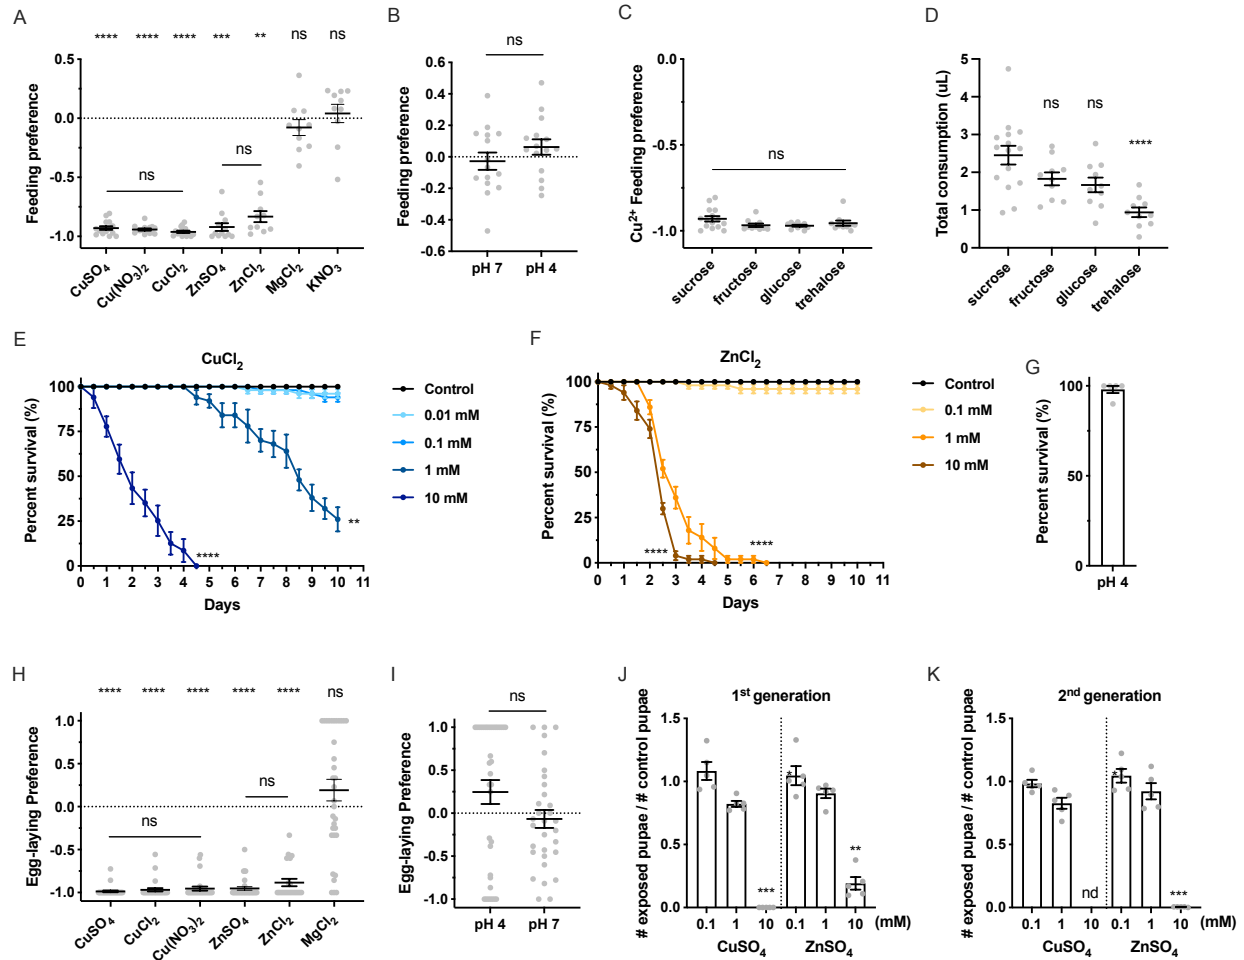

**Fig. S1.** Cation-specific taste avoidance to copper and toxic effects of copper and zinc.

(A) Feeding preferences to 10 mM  $\text{CuSO}_4$ ,  $\text{CuCl}_2$ ,  $\text{Cu}(\text{NO}_3)_2$ ,  $\text{ZnSO}_4$ ,  $\text{ZnCl}_2$ ,  $\text{MgCl}_2$ , and  $\text{KNO}_3$ . Asterisks on top indicate significant differences from 0.  $n = 10-15$ . \*\*\*\* $p < 0.0001$ , Wilcoxon signed rank test. No significant differences were found among different copper salts. Kruskal-Wallis test. (B) Feeding preferences to 10 mM sucrose at neutral pH or pH 4, acidified with HCl, tested against 10 mM sucrose alone.  $n = 15$ .  $p = 0.436$ , Mann-Whitney U test. (C) Feeding preferences to 10 mM  $\text{CuSO}_4$  in CAFE assay, with 10 mM sucrose replaced with 10 mM other sugars as indicated above.  $n = 10-15$ .  $p = 0.176$ , Kruskal-Wallis test. (D) Total volume consumed by 10 flies in the CAFE assay within 3 hours. Conditions were the same as in (C).  $n = 10-15$ . \*\*\*\* $p < 0.0001$ , Kruskal-Wallis test followed by uncorrected Dunn's test. (E) Survival rate of flies raised on normal food and then transferred to 100 mM sucrose mixed with  $\text{CuCl}_2$  at the indicated concentrations for 10 consecutive days.  $n = 5$ . \*\* $p < 0.01$ , \*\*\*\* $p < 0.0001$ . Friedman test followed by uncorrected Dunn's test. (F) Survival rate of flies raised on 100 mM sucrose mixed with  $\text{ZnCl}_2$  at the indicated concentrations for 10 consecutive days.  $n = 5$ . \*\*\*\* $p < 0.0001$ . Friedman test followed by uncorrected Dunn's test. (G) Survival rate of flies raised on 100 mM sucrose acidified to pH 4 with HCl for 10 days.  $n = 5$ . (H) Egg-laying preferences to 10 mM  $\text{CuSO}_4$ ,  $\text{CuCl}_2$ ,  $\text{Cu}(\text{NO}_3)_2$ ,  $\text{ZnSO}_4$ ,  $\text{ZnCl}_2$ , and  $\text{MgCl}_2$ . Asterisks on top indicate significant differences from 0.  $n = 22-33$ . \*\*\*\* $p < 0.0001$ , Wilcoxon signed-rank test. No significant differences were found among different copper salts. Kruskal-Wallis test. (I) Egg-laying preferences to 100 mM sucrose at neutral pH or pH 4 acidified with HCl against 100 mM sucrose alone.  $n = 31-36$ .  $p = 0.075$ , Mann-Whitney U test. (J) Pupae number in metal-supplemented vials as compared to control vials for the first generation.  $n = 5$ . \* $p < 0.05$ , \*\* $p < 0.01$ , \*\*\* $p < 0.001$ , Kruskal-Wallis test followed by uncorrected Dunn's test. (K) Pupae number in metal-supplemented vials as compared to control vials for the second generation. "nd", not determined, as no viable adults were

48 available in this condition. n = 5. \* p < 0.05, \*\*\* p < 0.001, Kruskal-Wallis test followed by uncorrected  
49 Dunn's test. Error bars are SEM.  
50

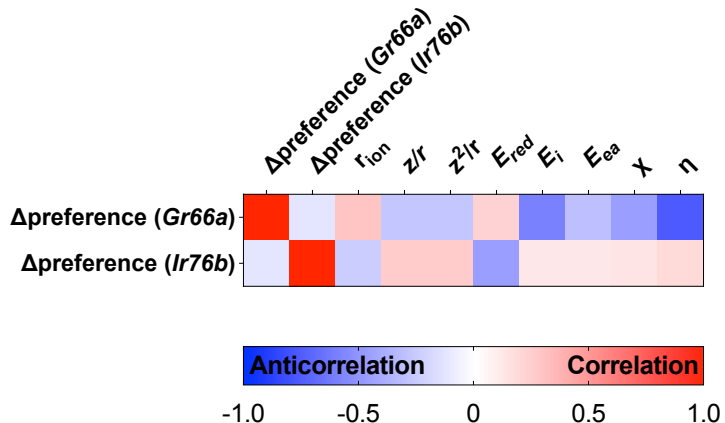

52

53

54

55

56

57

58

59

60

61

62

63

64

65

**Fig. S2. Spearman correlation matrix between the chemical properties of metal ions and the dependence of the corresponding avoidance responses on Gr66a or Ir76b**

$\Delta$ preference (Gr66a) and  $\Delta$ preference (Ir76b) are defined below.  $r_{ion}$ , effective ionic radii; values were taken from (1).  $z$  refers to charge number.  $z/r$ , ratio of charge to radius.  $z^2/r$  is directly related to hydration energy of a cation.  $E_{red}$ , reduction potential; values were taken from (2).  $E_i$ , ionization energy.  $E_{ea}$ , electron affinity.  $\chi$ , absolute electronegativity.  $\eta$ , absolute hardness; values were taken from (3). The analysis was performed with the 9 metal ions tested in Fig. 3:  $Cu^{2+}$ ,  $Zn^{2+}$ ,  $Mn^{2+}$ ,  $Fe^{2+}$ ,  $Fe^{3+}$ ,  $Co^{2+}$ ,  $Ni^{2+}$ ,  $Ag^+$ , and  $Cd^{2+}$ . The strongest correlation was between  $\Delta$ preference (Gr66a) and  $\eta$  (Spearman correlation  $r = -0.767$ ,  $p = 0.021$ ). In two cases the preference was slightly more negative for the mutant than the control and in these two cases we have simplified by using 0 as a value for the  $\Delta$ preference; thus we use the larger ("max") of the  $\Delta$ preference or 0. abs, absolute value.

66

$$\Delta\text{preference (receptor)} = \frac{\max((\text{preference(receptor)} - \text{preference(Control)}), 0)}{\text{abs}(\text{preference(Control)})}$$

67

68

69

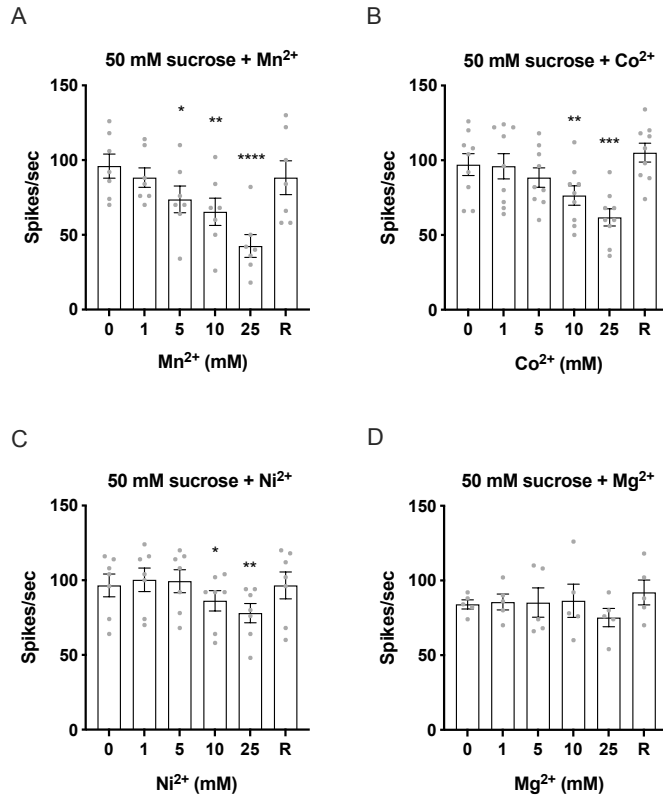

70  
71  
72  
73  
74  
75  
76  
77  
78  
79  
80  
81  
82  
83  
84

**Fig. S3.** Effects of different concentrations of MnSO<sub>4</sub>, CoSO<sub>4</sub>, NiSO<sub>4</sub>, and MgCl<sub>2</sub> on sugar responses in L sensilla.

Mixtures of 50 mM sucrose with increasing concentrations of metal ions were applied to the same L sensilla at 2 min intervals. “R” denotes “recovery”, *i.e.* the response to 50 mM sucrose after the sensilla were stimulated with sucrose-metal mixtures. (A) Responses with sucrose-metal mixtures. n = 7, \*p < 0.05, \*\*p < 0.01, \*\*\*\*p < 0.0001, Friedman test followed by uncorrected Dunn’s test. (B) Responses to sucrose and sucrose-cobalt mixtures from L sensilla. n = 9, \*\*p < 0.01, \*\*\*p < 0.001, Friedman test followed by uncorrected Dunn’s test. (C) Responses to sucrose and sucrose-nickel mixtures from L sensilla. n = 7, \*p < 0.05, \*\*p < 0.01, Friedman test followed by uncorrected Dunn’s test. (D) Responses to sucrose and sucrose-magnesium mixtures from L sensilla. n = 5, p = 0.374, Friedman test. Error bars are SEM.

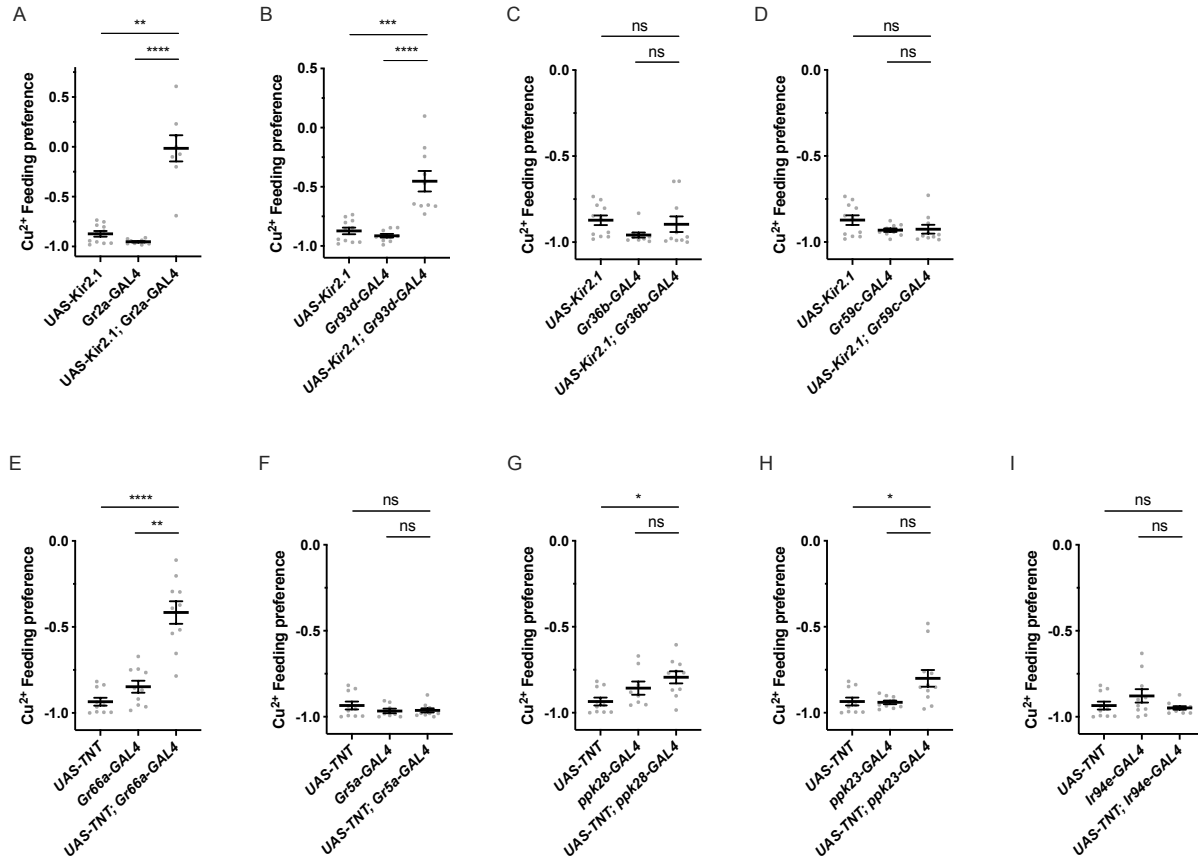

85  
86  
87  
88  
89  
90  
91  
92  
93

**Figure S4.** Feeding preferences to 10 mM CuSO<sub>4</sub> when signaling from subsets of taste neurons is impaired. (A-D) Effect of expression of Kir2.1 with different receptor-GAL4 drivers on feeding preference to copper. n = 10-11. \*\*p < 0.01, \*\*\*p < 0.001, \*\*\*\*p < 0.0001, Kruskal-Wallis test followed by Dunn's tests. (E-I) Effect of expression of TNT with different receptor-GAL4 drivers on feeding preference to copper. n = 8-10. \*p < 0.05, \*\*p < 0.01, \*\*\*\*p < 0.0001, Kruskal-Wallis test followed by Dunn's tests. Error bars are SEM.

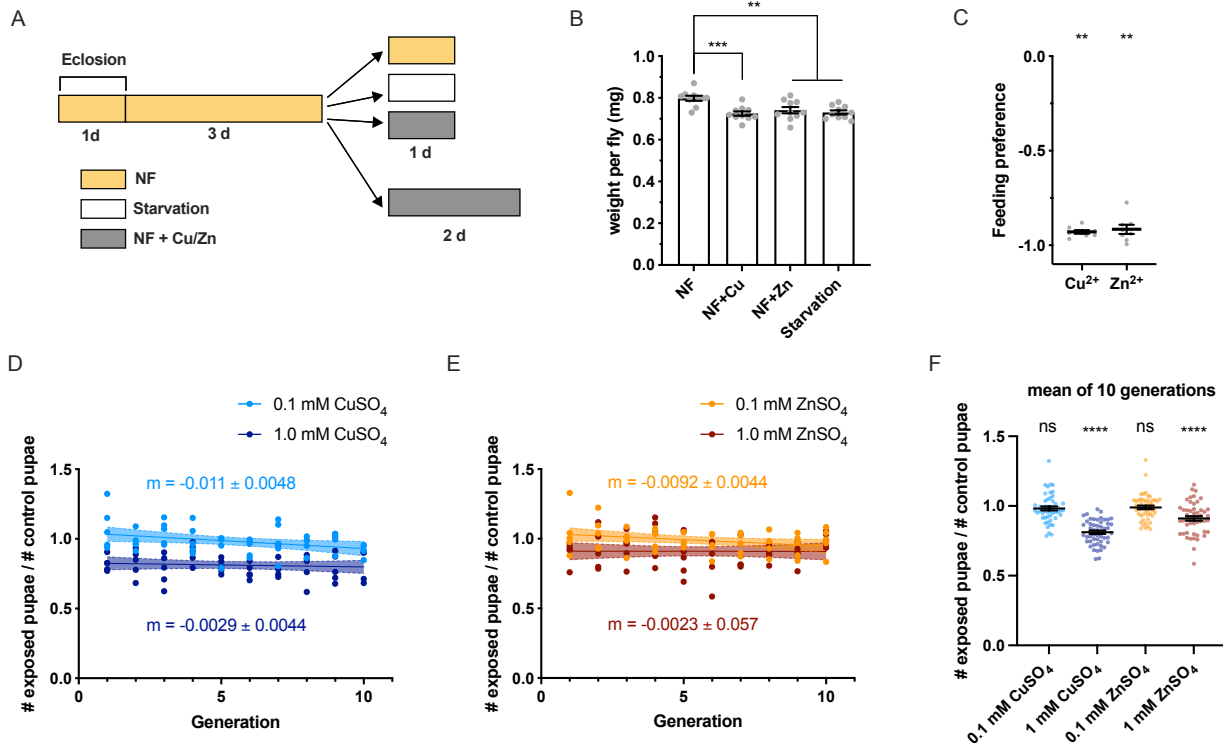

95  
 96  
 97  
 98  
 99  
 100  
 101  
 102  
 103  
 104  
 105  
 106  
 107  
 108  
 109

**Fig. S5.** Effect of short- and long-term exposure of copper and zinc.

(A) Exposure regime. "NF" denotes normal food. "Cu/Zn" indicates either Cu or Zn. (B) Weight per male fly after short exposure of copper or zinc, or starvation.  $n = 10$ .  $**p < 0.01$ ,  $***p < 0.001$ , Kruskal-Wallis test followed by uncorrected Dunn' tests. (C) Feeding avoidance of 10 mM  $\text{CuSO}_4$  and 10 mM  $\text{ZnSO}_4$  in male flies. (D) Ratio of pupae in copper-supplemented vials as compared to control vials for 10 generations.  $n = 5$ . Simple linear regression was plotted with 95% confidence intervals.  $m$ , the slope is given with SEM. (E) Ratio of pupae in zinc-supplemented vials as compared to control vials for 10 generations.  $n = 5$ . Simple linear regression was plotted with 95% confidence intervals.  $m$ , the slope was given with SEM. (F) Means of ratios of pupae in metal-supplemented vials to control vials across 10 generations.  $n = 50$ , i.e. 5 vials per generation  $\times$  10 generations. Asterisks indicate significant differences from 1.  $****p < 0.0001$ , Wilcoxon signed-rank test. Error bars are SEM.

110 **Table S1.** Number of action potentials in Fig. 4B (mean  $\pm$  SEM)  
 111

|     | Zn <sup>2+</sup> | Co <sup>2+</sup> | Mn <sup>2+</sup> | Ni <sup>2+</sup> | Cd <sup>2+</sup> | Cu <sup>2+</sup> |
|-----|------------------|------------------|------------------|------------------|------------------|------------------|
| S5  | 37.8 $\pm$ 1.8   | 34.4 $\pm$ 6.4   | 31.7 $\pm$ 2.5   | 29.0 $\pm$ 5.3   | 24.4 $\pm$ 2.6   | 12.0 $\pm$ 1.9   |
| S3  | 34.2 $\pm$ 4.4   | 29.0 $\pm$ 9.5   | 24.0 $\pm$ 9.0   | 16.6 $\pm$ 7.3   | 21.6 $\pm$ 4.4   | 8.4 $\pm$ 2.0    |
| S9  | 34.0 $\pm$ 6.6   | 18.3 $\pm$ 2.8   | 16.2 $\pm$ 3.5   | 20.2 $\pm$ 4.9   | 16.8 $\pm$ 1.0   | 8.8 $\pm$ 2.7    |
| S1  | 4.0 $\pm$ 1.8    | 1.2 $\pm$ 0.6    | 3.5 $\pm$ 1.1    | 3.2 $\pm$ 2.0    | 0.8 $\pm$ 0.8    | 3.8 $\pm$ 0.9    |
| S10 | 2.2 $\pm$ 1.2    | 2.5 $\pm$ 2.5    | 9.0 $\pm$ 4.4    | 4.5 $\pm$ 2.1    | 1.2 $\pm$ 1.0    | 7.0 $\pm$ 2.0    |
| S7  | 10.2 $\pm$ 2.7   | 13.3 $\pm$ 4.8   | 14.4 $\pm$ 2.1   | 10.9 $\pm$ 2.2   | 1.3 $\pm$ 1.0    | 8.0 $\pm$ 2.3    |
| S2  | 5.2 $\pm$ 1.9    | 9.7 $\pm$ 2.8    | 8.6 $\pm$ 4.3    | 8.4 $\pm$ 4.6    | 8.4 $\pm$ 1.9    | 9.7 $\pm$ 2.6    |
| S6  | 6.9 $\pm$ 2.9    | 13.6 $\pm$ 6.2   | 6.3 $\pm$ 2.0    | 5.8 $\pm$ 3.1    | 7.6 $\pm$ 2.4    | 10.9 $\pm$ 1.7   |

112



113 **SI References**

114

115 1. R. D. Shannon, Revised effective ionic radii and systematic studies of interatomic distances in  
116 halides and chalcogenides. *Acta Cryst A* **32**, 751–767 (1976).

117 2. W. M. Haynes, D. R. Lide, T. J. Bruno, *CRC handbook of chemistry and physics: a ready reference*  
118 *book of chemical and physical data*, 93rd ed (CRC, 2012).

119 3. R. G. Pearson, Absolute electronegativity and hardness: application to inorganic chemistry. *Inorg.*  
120 *Chem.* **27**, 734–740 (1988).

121
